# Supplementary material
Source: PubMed Central journal article supplement (PMC9890461)
Supplement: cvab263_supplementary_data.pdf [file cvab263_supplementary_data.pdf]

## Supplemental Material

### Vascular endothelial Tissue Factor contributes to trimethylamine N-oxide-enhanced arterial thrombosis

Marco Witkowski<sup>1,3</sup>, Mario Witkowski<sup>4</sup>; Julian Friebel<sup>3,5</sup>; Jennifer A. Buffa<sup>1</sup>, Xinmin S Li<sup>1</sup>, Zeneng Wang<sup>1</sup>, Naseer Sangwan<sup>1</sup>, Lin Li<sup>1</sup>, Joseph A. DiDonato<sup>1</sup>, Caroline Tizian<sup>4</sup>, Arash Haghikia<sup>3</sup>, Daniel Kirchhofer<sup>6</sup>, François Mach<sup>7</sup>, Lorenz Räber<sup>8</sup>, Christian M. Matter<sup>9,10</sup>, W.H. Wilson Tang<sup>1,2</sup>, Ulf Landmesser<sup>3,5</sup>, Thomas F. Lüscher<sup>9,11</sup>, Ursula Rauch<sup>3\*</sup> and Stanley L. Hazen<sup>1,2\*</sup>

<sup>1</sup> Department of Cardiovascular & Metabolic Sciences, Lerner Research Institute, and

<sup>2</sup> Department of Cardiovascular Medicine, Heart, Vascular & Thoracic Institute, Cleveland Clinic, 9500 Euclid Ave, Cleveland, OH, USA

<sup>3</sup> Charité Centrum 11, Department of Cardiology, Charité–Universitätsmedizin, Berlin, Germany

<sup>4</sup> Laboratory of Innate Immunity, Department of Microbiology, Infectious Diseases and Immunology, Charité-Universitätsmedizin Berlin, Berlin, Germany

<sup>5</sup> Berlin Institute of Health, Berlin, Germany

<sup>6</sup> Department of Early Discovery Biochemistry, Genentech, Inc., South San Francisco, CA, USA.

<sup>7</sup> Cardiology, University Hospital Geneva, Geneva, Switzerland

<sup>8</sup> Cardiology, Inselspital Bern, Bern, Switzerland

<sup>9</sup> Center for Molecular Cardiology, University of Zurich, Wagistrasse 12, CH-8952, Schlieren, Switzerland

<sup>10</sup> Cardiology, University Heart Center, University Hospital Zurich, Zurich, Switzerland

<sup>11</sup> Department of Cardiology, Royal Brompton and Harefield Hospitals, Imperial College, London, SW3 6NP, UK

\* co-Corresponding authors.

Stanley L. Hazen

Tel: +1 216 445 9763. Fax: +1 216 444 9404.

Email: [hazens@ccf.org](mailto:hazens@ccf.org)

Full address: Lerner Research Institute, Cleveland Clinic, 9500 Euclid Avenue, Room NC1-127, mail code NC-10, Cleveland, Ohio 44195

Ursula Rauch

Tel: +49 30 8445 2362. Fax: +49 30 8445 4648

Email: [ursula.rauch@charite.de](mailto:ursula.rauch@charite.de)

Full address: Charité Centrum 11, Department of Cardiology, Charité - Universitätsmedizin Berlin, Campus Benjamin Franklin, Hindenburgdamm 30, 12200, Berlin, Germany.

**Supplemental Table 1. Patient characteristics for GeneBank cohort on anti-platelets**

| <b>Characteristic</b>                         | <b>Anti-platelet therapy<br/>(N=2989)</b> | <b>Aspirin alone<br/>(N=2793)</b> |
|-----------------------------------------------|-------------------------------------------|-----------------------------------|
| <b>Age (yr)</b>                               | 62.8±10.8                                 | 63.0±10.7                         |
| <b>Male (%)</b>                               | 67.2                                      | 66.7                              |
| <b>Diabetes (%)</b>                           | 32.2                                      | 32.9                              |
| <b>Hypertension (%)</b>                       | 73.5                                      | 73.0                              |
| <b>Smoking (%)</b>                            | 65.5                                      | 64.6                              |
| <b>MACE 3 Years (%)</b>                       | 12.3                                      | 12.2                              |
| <b>CVD (%)</b>                                | 84.5                                      | 83.4                              |
| <b>CHF (%)</b>                                | 16.3                                      | 15.4                              |
| <b>History of MI (%)</b>                      | 46.1                                      | 43.7                              |
| <b>History of stroke (%)</b>                  | 6.3                                       | 6.1                               |
| <b>BMI (kg/m<sup>2</sup>)</b>                 | 28.7(25.8-32.5)                           | 28.7(25.8-32.6)                   |
| <b>LDL cholesterol (mg dl<sup>-1</sup>)</b>   | 94.0(77.0-114.0)                          | 95.0(77.0-114.0)                  |
| <b>HDL cholesterol (mg dl<sup>-1</sup>)</b>   | 33.8(28.1-40.2)                           | 33.9(28.2-40.4)                   |
| <b>Total cholesterol (mg dl<sup>-1</sup>)</b> | 160.0(139.0-186.1)                        | 160.5(139.6-186.6)                |
| <b>Triglycerides (mg dl<sup>-1</sup>)</b>     | 121.0(86.0-174.0)                         | 121.0(86.0-173.0)                 |
| <b>Follow-up anti-platelet regimen</b>        |                                           |                                   |
| <b>Aspirin (%)</b>                            | 99.0                                      | 100.0                             |
| <b>Clopidogrel (%)</b>                        | 6.6                                       | 0.0                               |
| <b>Ticagrelor</b>                             | 0.0                                       | 0.0                               |
| <b>Prasugrel</b>                              | 0.0                                       | 0.0                               |

Characteristics of patients in GeneBank receiving anti-platelet drugs or aspirin alone for whom TMAO levels were available. Continuous data are presented as mean ± standard deviation or median (interquartile range), categorical variables are presented as %. BMI, body mass index; CHF, congestive heart failure; CVD, cardiovascular disease; HDL, high-density lipoprotein; LDL, low-density lipoprotein; MACE, major adverse cardiac events; MI, myocardial infarction.

**Supplemental Table 2. Patient characteristics for multi-center Swiss ACS cohort on dual anti-platelet therapy**

| <b>Characteristic</b>                         | <b>Dual anti-platelet therapy (N=1469)</b> |
|-----------------------------------------------|--------------------------------------------|
| <b>Age (yr)</b>                               | 63.4±12.3                                  |
| <b>Male (%)</b>                               | 77.5                                       |
| <b>Diabetes (%)</b>                           | 16.9                                       |
| <b>Hypertension (%)</b>                       | 57.5                                       |
| <b>Smoking (%)</b>                            | 69.9                                       |
| <b>MACE 1 Years (%)</b>                       | 10.2                                       |
| <b>CVD (%)</b>                                | 36.8                                       |
| <b>CHF (%)</b>                                | 1.2                                        |
| <b>History of MI (%)</b>                      | 14.7                                       |
| <b>History of stroke (%)</b>                  | 1.97                                       |
| <b>BMI (kg/m<sup>2</sup>)</b>                 | 26.5(24.3-29.3)                            |
| <b>LDL cholesterol (mg dl<sup>-1</sup>)</b>   | 119.6(92.0-149.4)                          |
| <b>HDL cholesterol (mg dl<sup>-1</sup>)</b>   | 43.3(36.4-53.4)                            |
| <b>Total cholesterol (mg dl<sup>-1</sup>)</b> | 189.5(158.6-220.4)                         |
| <b>Triglycerides (mg dl<sup>-1</sup>)</b>     | 90.3(61.1-139.1)                           |

Characteristics of patients in the Swiss ACS cohort on dual anti-platelet therapy. Continuous data are presented as mean ± standard deviation or median (interquartile range), categorical variables are presented as %. BMI, body mass index; CHF, congestive heart failure; CVD, cardiovascular disease; HDL, high-density lipoprotein; LDL, low-density lipoprotein; MACE, major adverse cardiac events; MI, myocardial infarction.

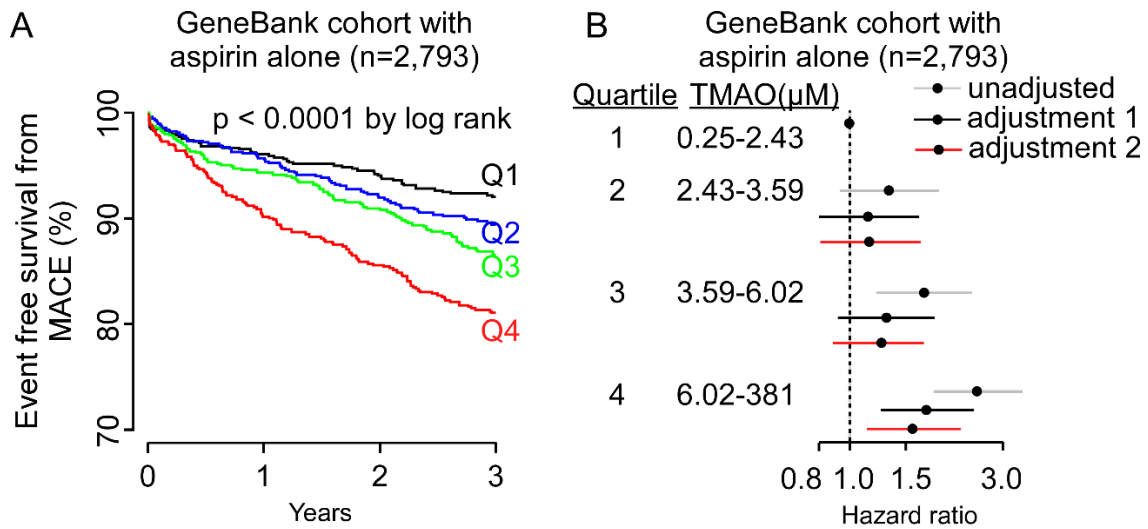

**Supplemental Figure 1. A**, Kaplan-Meier estimates and the risk of incident major adverse cardiac events (MACE) (MI, stroke, or death) over follow-up periods ranked by quartiles of TMAO levels in Genebank subjects with aspirin alone. **B**, Forest plots indicating the risks of incident MACE at 3 years stratified by quartiles of TMAO levels, multivariable Cox model for hazard ratio included adjustments for age, gender, hypertension, smoking, diabetes, HDL, LDL, TG (adjustment1) and in addition creatinine (adjustment2). The 5–95% confidence interval is indicated by line length.

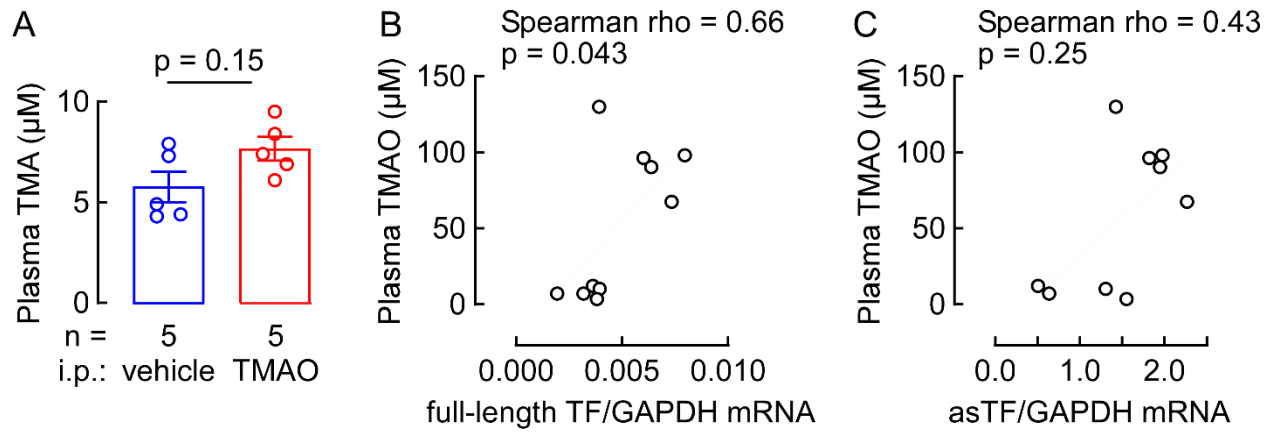

**Supplemental Figure 2.** (A) TMA plasma levels of C57/BL6 mice 1.5h following i.p. injection with either vehicle or TMAO. (B and C) Correlation of plasma TMAO with aortic mRNA expression of full length TF and alternatively-spliced (as)TF. Results are presented as mean  $\pm$  SEM. Both n and each data point represent individual biological replicates (animals). Differences between 2 groups were assessed using a Mann-Whitney test. Association of TMAO with TF mRNA was analyzed by Spearman correlation.

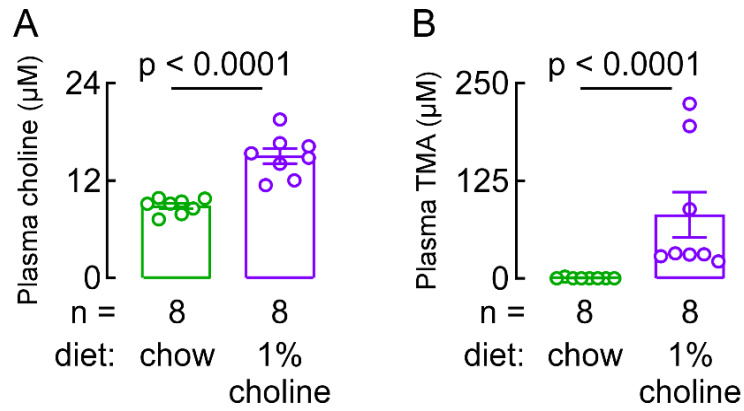

**Supplemental Figure 3.** (A), Plasma levels of choline and (B) TMA from C57/BL6 mice that were maintained on a control chow diet or a 1 g% choline-supplemented diet (Methods) for 10 days. Results are presented as mean  $\pm$  SEM for the indicated numbers of mice. Differences between 2 groups were analyzed using a Mann-Whitney test.

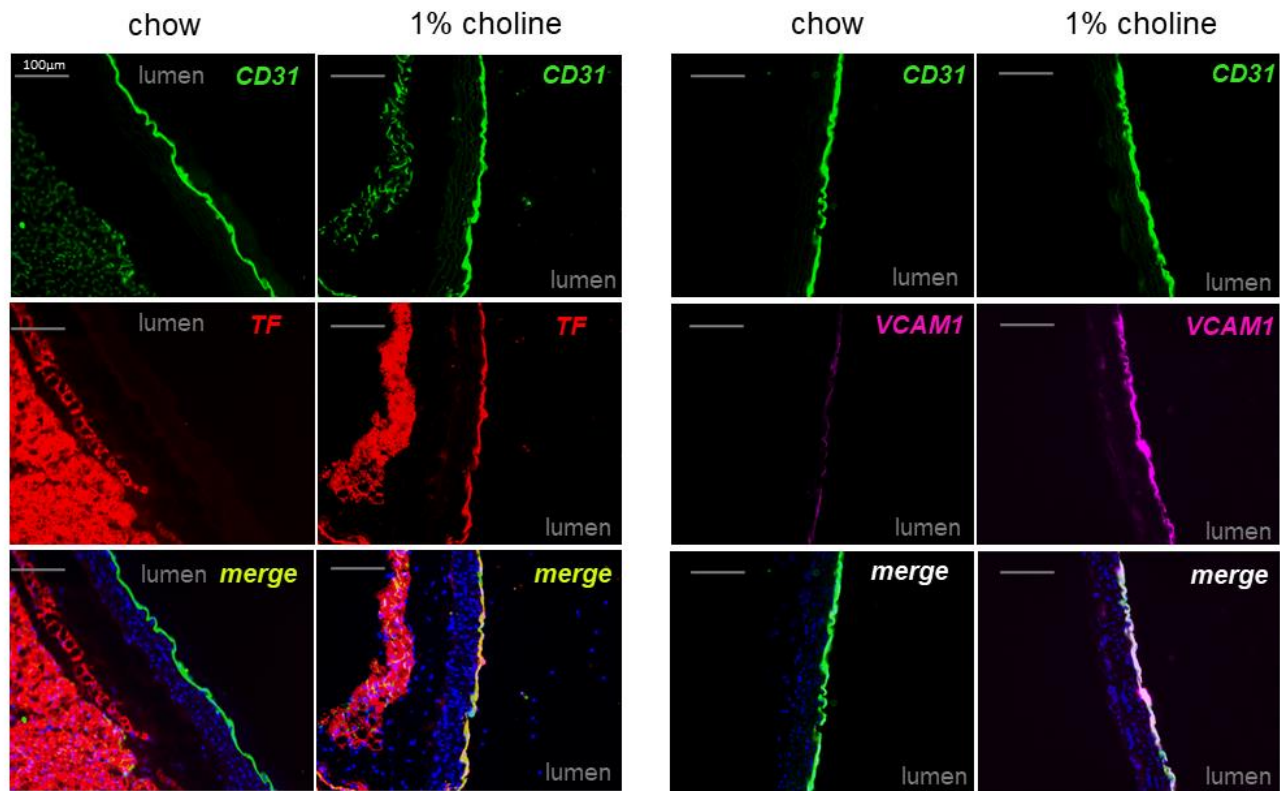

**Supplemental Figure 4.**

Mouse aortic tissue retrieved from animals on a chow vs. 1% choline diet was stained for TF (red), VCAM1 (purple), CD31 (green) and counterstained with DAPI (blue) as outlined in Methods. Merging of the signals confirmed that a choline-supplemented diet induced TF and VCAM1 protein in the endothelium, evidenced by co-localization with CD31.

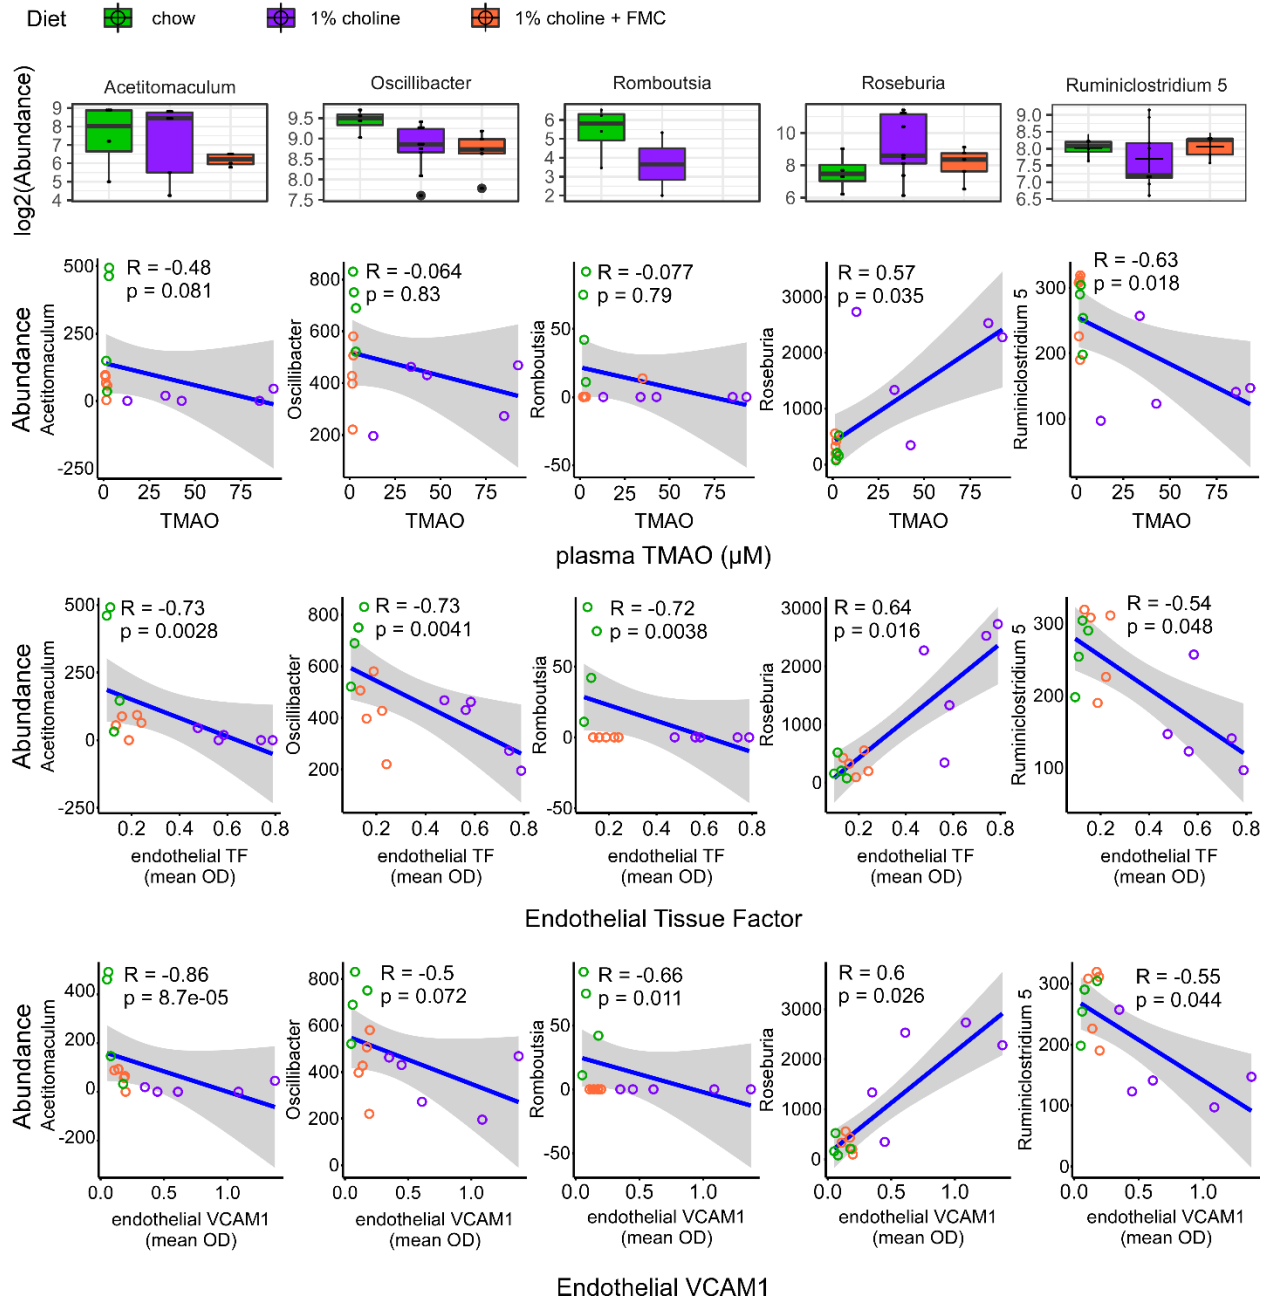

**Supplemental Figure 5. Upper panel**, Statistically significant (Benjamini-Hochberg False Discovery Rate  $P < 0.05$ ) genera differentiating 3 groups (chow, choline, and choline+FMC). Plotted are interquartile range(IQR)s (boxes). The dark line in the box is the median, lower whiskers represent smallest observation ( $\geq 25\%$  quantile -  $1.5 * IQR$ ), upper whiskers largest observation ( $\leq 75\%$  quantile -  $1.5 * IQR$ ) with outliers as dots



outside of the box. **Second panel**, Scatter plots based on linear regression showing correlation between abundance of indicated genera with plasma TMAO ( $\mu\text{M}$ ) levels, **(third panel)** endothelial TF protein and **(fourth panel)** endothelial VCAM1 protein in mouse aortas on the indicated diets, expressed as optical density (OD) within the annotated endothelial layer quantified by immunofluorescence (as described in Methods).  $R^2$  and p values are indicated in each panel. The grey area shows the 95% confidence interval.

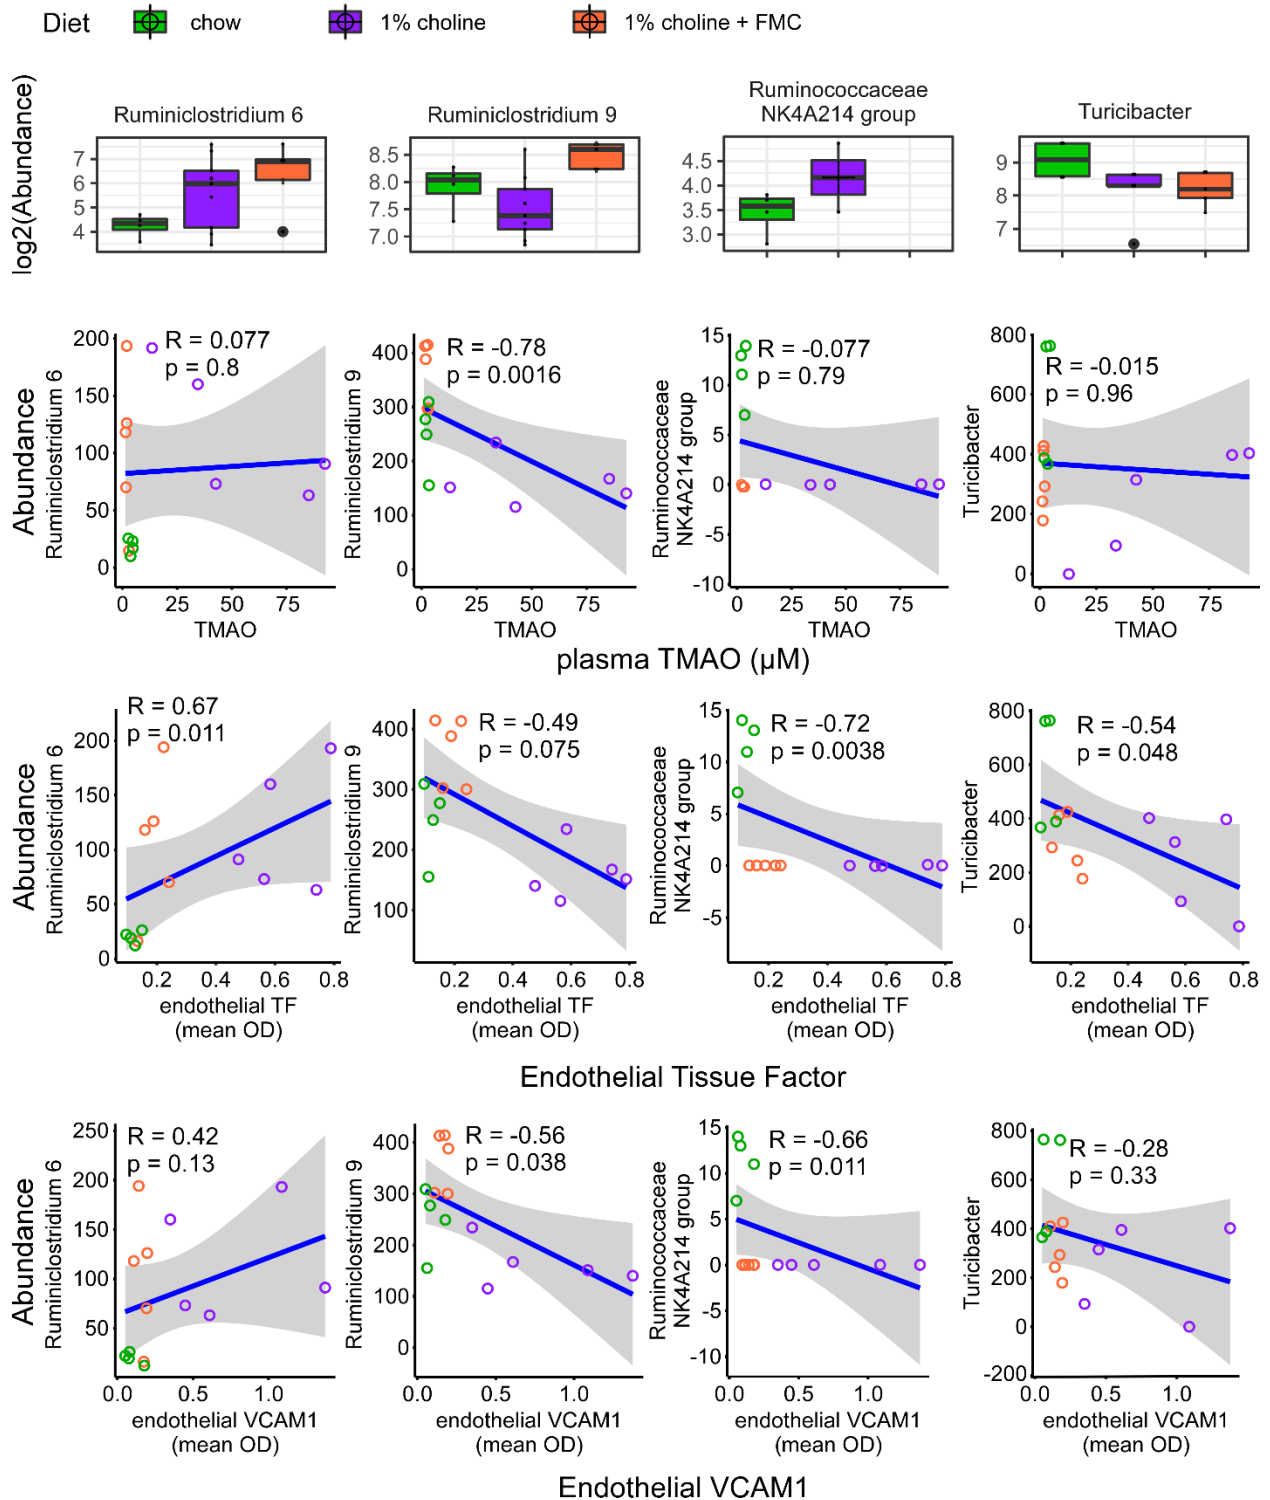

**Supplemental Figure 6 (Extension of Supplemental Figure 5). Upper panel,**  
 Statistically significant (Benjamini-Hochberg False Discovery Rate  $P < 0.05$ ) genera

differentiating 3 groups (chow, choline, and choline+FMC). Plotted are interquartile range(IQR)s (boxes). The dark line in the box is the median, lower whiskers represent smallest observation ( $\geq 25\%$  quantile -  $1.5 * IQR$ ), upper whiskers largest observation ( $\leq 75\%$  quantile -  $1.5 * IQR$ ) with outliers as dots outside of the box. **Second panel**, Scatter plots based on linear regression showing correlation between abundance of indicated genera with plasma TMAO ( $\mu\text{M}$ ) levels, (**third panel**) endothelial TF protein and (**fourth panel**) endothelial VCAM1 protein in mouse aortas on the indicated diets, expressed as optical density (OD) within the annotated endothelial layer quantified by immunofluorescence (as described in Methods).  $R^2$  and p values are indicated in each panel. The grey area shows the 95% confidence interval.
